# Supplementary material for: Cerumen microbial community shifts between healthy and otitis affected dogs
Source: PLoS One. 2020 Nov 25;15(11):e0241447. doi: 10.1371/journal.pone.0241447 (PMC7688138; doi:10.1371/journal.pone.0241447)
Supplement: S3 Table — Features identified by ANCOM as differentially abundant between groups. ANCOM analysis carried out on the total population included in the present study. (XLSX) [file pone.0241447.s008.xlsx]

## Sheet: Foglio1
S3 Table: Features identified by ANCOM as differentially expressed between healthy and affected dogs
features ID	W	Taxonomy
c961a6807004cea4e0c552f07b4f8450	5025	Pseudomonas
3a62a928df7d9d827b10839ad0547fe7	5019	Pseudomonas
4efe05304dce20a49407f6464aafb3b0	4997	Pseudomonas
6c93550067203b3a2715bb51313063af	4991	Pseudomonas
34122cc129525e668e0b4c8f56a42558	4965	Staphylococcus
6c11e5476a1292d344c6994a1d903f36	4897	Sphingomonas
677ff15173d80511f4c0c056b614db2f	4893	Pseudomonas
cf0cd6b3ec04b7f3ccbe9bf8b6416d97	4892	Proteus
94e14594386c4bf146a202b510851199	4888	Pseudomonas
eaeec474201946244a2bc88b3effd5ae	4861	Pseudomonas
b95f830d5b3ac176e2e1e0828344d5a9	4845	Pseudomonas
ef802c04e66c60474fec863473a1cc6a	4810	Pseudomonas
1592b5e3909f553c5a3a1d5b121c9de3	4771	f__Methylobacteriaceae
2b1bd96e398b5b5851cf66abf5ae604d	4716	g__Propionibacterium; s__acnes
5eb54ac25e2545b5c33090f09fab596d	4688	Pseudomonas
b8ad3f56969579baf86a464a92bf5aa4	4650	Proteus
e95cc3c507eb14495dda55e98d378a2d	4625	Pseudomonas
